# Supplementary material
Source: publisher figshare collection journal article supplement (https://acs.figshare.com/ndownloader/files/20333406)
Supplement: Supplementary file 1 [file 20333406]

## Sheet: Interolog
point_mutaion_site	before	after	UniprotID	Int3D structure	**	MI Interolog_PDBID Chain_A Chain_B
3	A	V	P49917	P49917-Q13426-EXP-1ik9.pdb1-C-0-A-0.pdb	|||||	1128 1ik9 C A * 3II6 Y A 3II6 X B 3II6 Y A
14	V	A	P49917	P49917-Q96SD1-EXP-4htp.pdb1-A-0-C-0.pdb	|||||	1128 1ik9 C A * 3II6 Y A 3II6 X B 3II6 Y A
18	D	H	P49917	P49917-Q96SD1-EXP-4htp.pdb1-A-0-C-0.pdb	|||||	1128 1ik9 C A * 3II6 Y A 3II6 X B 3II6 Y A
35	D	A	P55072	P55072-Q9UKV5-EXP-3tiw.pdb2-B-0-D-0.pdb	|||||	1133 1s3s F G * 6OPC Z A
35	D	N	P55072	P55072-Q9UKV5-EXP-3tiw.pdb2-B-0-D-0.pdb	|||||	1133 1s3s F G * 6OPC Z A
38	V	A	P55072	P55072-Q9UKV5-EXP-3tiw.pdb2-B-0-D-0.pdb	|||||	1133 1s3s F G * 6OPC Z A
42	F	A	P49917	P49917-Q96SD1-EXP-4htp.pdb1-A-0-C-0.pdb	|||||	1128 1ik9 C A * 3II6 Y A 3II6 X B 3II6 Y A
49	F	A	P49917	P49917-Q96SD1-EXP-4htp.pdb1-A-0-C-0.pdb	|||||	1128 1ik9 C A * 3II6 Y A 3II6 X B 3II6 Y A
58	S	A	P84243	P62805-P84243-EXP-4h9q.pdb2-B-0-A-0.pdb	|||||	1128 1kx5 A B * 5ZBA D C 5ZBB D C
70	I	A	P55072	P55072-Q9UKV5-EXP-3tiw.pdb2-B-0-D-0.pdb	|||||	1133 1s3s F G * 6OPC Z A
72	L	A	P55072	P55072-Q9UKV5-EXP-3tiw.pdb2-B-0-D-0.pdb	|||||	1133 1s3s F G * 6OPC Z A
76	K	R	Q9UQB9	Q9NQS7-Q9UQB9-MDL-4c2w.pdb1-D-0-A-0.pdb	|||||	1128 2bfx A D * 4C2W C B 4AF3 D A
83	K	E	Q01196	Q01196-Q13951-EXP-1h9d.pdb2-C-0-D-0.pdb	|||||	1133 1e50 A B * 1E50 Q B
91	G	L	P84243	P62805-P84243-EXP-4h9q.pdb2-B-0-A-0.pdb	|||||	1128 1kx5 A B * 5ZBA D C 5ZBB D C
91	G	V	P84243	P62805-P84243-EXP-4h9q.pdb2-B-0-A-0.pdb	|||||	1128 1kx5 A B * 5ZBA D C 5ZBB D C
91	G	M	P84243	P62805-P84243-EXP-4h9q.pdb2-B-0-A-0.pdb	|||||	1128 1kx5 A B * 5ZBA D C 5ZBB D C
91	G	D	P84243	P62805-P84243-EXP-4h9q.pdb2-B-0-A-0.pdb	|||||	1128 1kx5 A B * 5ZBA D C 5ZBB D C
94	Q	A	P84243	P62805-P84243-EXP-4h9q.pdb2-B-0-A-0.pdb	|||||	1128 1kx5 A B * 5ZBA D C 5ZBB D C
95	E	A	P84243	P62805-P84243-EXP-4h9q.pdb2-B-0-A-0.pdb	|||||	1128 1kx5 A B * 5ZBA D C 5ZBB D C
101	P	A	Q13309	P63208-Q13309-EXP-1fs1.pdb1-D-0-C-0.pdb	|||||	1128 2ass B A * 1FS1 C B 1FS1 B A 1FQV C L 1FQV E L 1FQV G P 1FQV I B 1FQV K D 1FQV M F 1FQV O H
105	L	A	Q13309	P63208-Q13309-EXP-1fs1.pdb1-D-0-C-0.pdb	|||||	1128 2ass B A * 1FS1 C B 1FS1 B A 1FQV C L 1FQV E L 1FQV G P 1FQV I B 1FQV K D 1FQV M F 1FQV O H
108	I	A	Q13309	P63208-Q13309-EXP-1fs1.pdb1-D-0-C-0.pdb	|||||	1128 2ass B A * 1FS1 C B 1FS1 B A 1FQV C L 1FQV E L 1FQV G P 1FQV I B 1FQV K D 1FQV M F 1FQV O H
109	F	A	Q13309	P63208-Q13309-EXP-1fs1.pdb1-D-0-C-0.pdb	|||||	1128 2ass B A * 1FS1 C B 1FS1 B A 1FQV C L 1FQV E L 1FQV G P 1FQV I B 1FQV K D 1FQV M F 1FQV O H
111	C	E	P84243	P84243-Q9NVP2-EXP-5bnx.pdb1-A-0-D-0.pdb	|||||	1128 1kx5 A B * 5ZBA D C 5ZBB D C
113	R	A	P55072	P55072-Q92890-EXP-5b6c.pdb1-A-0-B-0.pdb	|||||	1133 1s3s F G * 6OPC Z A
114	S	L	Q01196	Q01196-Q13951-EXP-1h9d.pdb2-C-0-D-0.pdb	|||||	1133 1e50 A B * 1E50 Q B
115	H	A	P55072	P55072-Q92890-EXP-5b6c.pdb1-A-0-B-0.pdb	|||||	1133 1s3s F G * 6OPC Z A
126	R	A	Q13309	P63208-Q13309-EXP-1fs1.pdb1-D-0-C-0.pdb	|||||	1128 2ass B A * 1FS1 C B 1FS1 B A 1FQV C L 1FQV E L 1FQV G P 1FQV I B 1FQV K D 1FQV M F 1FQV O H
131	F	A	P55072	P55072-Q9UNZ2-MDL-1s3s.pdb1-F-0-G-0.pdb	|||||	1133 1s3s F G * 6OPC Z A
139	R	Q	Q01196	Q01196-Q13951-EXP-1h9d.pdb2-C-0-D-0.pdb	|||||	1133 1e50 A B * 1E50 Q B
143	Y	A	P55072	P55072-Q9UKV5-EXP-3tiw.pdb2-B-0-D-0.pdb	|||||	1133 1s3s F G * 6OPC Z A
175	I	A	P55072	P55072-Q9UKV5-EXP-3tiw.pdb2-B-0-D-0.pdb	|||||	1133 1s3s F G * 6OPC Z A
183	H	A	P55072	P55072-Q9UNZ2-MDL-1s3s.pdb1-F-0-G-0.pdb	|||||	1133 1s3s F G * 6OPC Z A
